# Supplementary material
Source: Springer Nature journal article supplement (https://www.springermedizin.de/resource/supplementary/13756_2012_591_MOESM1_ESM.pdf/9683400)

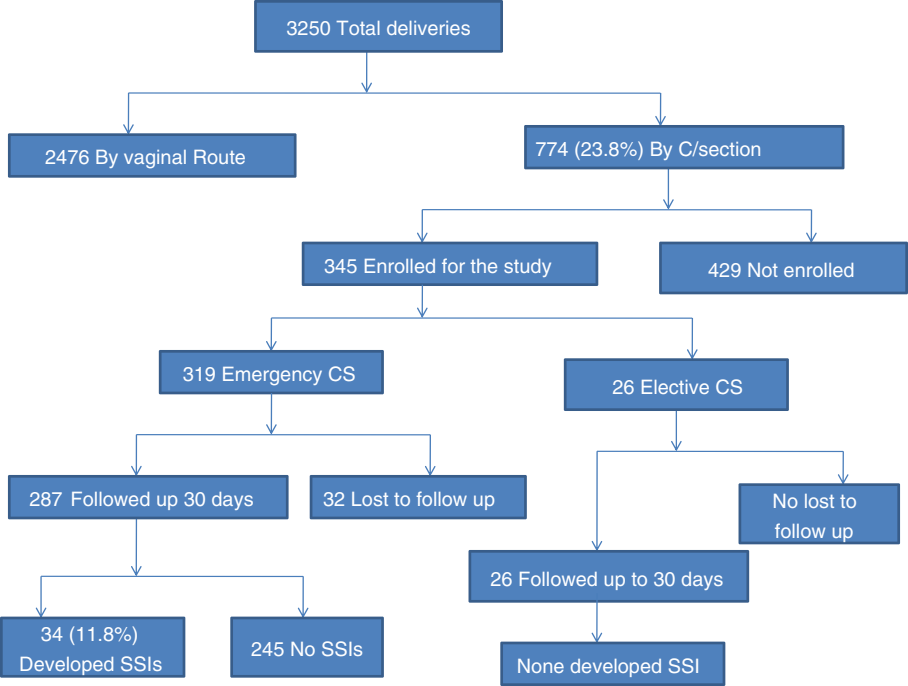

Supplement: MOESM1 [file 9683400]
